1 Male *Anolis* lizards prefer virgin females

2 Jessica Stapley

3

4 Affiliation

5 Smithsonian Tropical Research Institute, Panama and ETH Zurich, Switzerland.

6

7 Current address

8 Institute of Integrative Biology, ETH Zurich, Department of Environmental Sciences

9 Universitätstrasse 16, ETH Zentrum, CHN G 31.2

10 CH-8092 Zürich

11

12 Email: [Jessica.stapley@env.ethz.ch](mailto:Jessica.stapley@env.ethz.ch)

13 Running title: Male lizards prefer virgins

14

15 **Abstract**

16 Males can gain fitness benefits by preferentially courting and mating with virgin females  
17 if they represent a lower risk of sperm competition. When females mate multiply, but do  
18 not remate frequently, males can experience a lower level of sperm competition when  
19 mating with virgins. Male preference for virgins has been demonstrated many times in  
20 invertebrates but rarely in vertebrates. In this study, I tested if *Anolis apletophallus* males  
21 preferentially courted virgin females more than non-virgin females, in two-choice trials  
22 where the virgin was smaller than the non-virgin, and trials where the females were size-  
23 matched. In both trials males preferentially courted the virgin females more than non-  
24 virgin females. This suggests males can discriminate between females based on their  
25 reproductive history and that they do not use body size as a cue. Males most likely used  
26 visual signals from the female, although these signals could not be identified in this  
27 study. This is only the second study to show male preference for virgins in vertebrates.  
28 Although it is possible that male preference for virgins is relatively rare in vertebrates, I  
29 argue that certain life history traits, namely, where large females do not have reproductive  
30 benefits, and or when sperm is stored between subsequent reproductive events this  
31 preference function can evolve. Future studies focusing on such systems are likely to be  
32 fruitful with respect to this male mating preference and may help us to better understand  
33 the evolution of male mating preferences and female traits.

34

35 *Keywords:* male mate choice, sperm competition, courtship, male mate preference, *Anolis*  
36 *limifrons*, sexual selection.

37

38

## 39 **Introduction**

40           Although, females are generally considered the choosier sex, male mating  
41 preferences have also been demonstrated in a range of taxa when male courtship is costly  
42 and when female quality varies (for review see Bonduriansky 2001). The most common  
43 male mate preference reported is preference for larger, more fecund females (insects  
44 (Bonduriansky 2001), lizards (Whiting & Bateman 1999), snakes (Shine et al. 2003); and  
45 fish (Ptacek & Travis 1997; Wong & Jennions 2003). Amongst invertebrates another  
46 common male mating preference is preference for virgins (Bonduriansky 2001). Male  
47 mate preference for virgins is likely to maximize a male's fertilization success because of  
48 a reduction in sperm competition (see Bonduriansky 2001). Despite considerable  
49 evidence that males discriminate between females based on reproductive history in  
50 invertebrates, this has only been demonstrated once in a vertebrate, in the guppy  
51 (Guevara-Fiore et al. 2009).

52  
53           The dearth of studies in vertebrates demonstrating male preference for virgins  
54 begs the question; is male preference for virgins less common in vertebrates or does this  
55 simply represent a taxonomic bias in previous studies? For males to gain benefits from  
56 reduced sperm competition by mating with females, certain conditions are needed and  
57 some of these may be less common in vertebrates. Firstly, it requires internal fertilization,  
58 a common feature of vertebrates, however this precludes many fish species and  
59 amphibians. The one vertebrate example of male mate preference for virgin females  
60 comes from the guppy, which is one of the few fish that has internal fertilization  
61 (Guevara-Fiore et al. 2009). A preference for virgins is unlikely to evolve when larger or

62 older females represent greater reproductive value, and this is more likely in long-lived  
63 species. As already mentioned when larger females are more fecund males often prefer to  
64 mate with larger females (e.g. Bonduriansky 2001; Wong & Jennions 2003). A recent  
65 study in guppies found that male preference for larger females can persist in populations  
66 even when fecundity is not correlated to female body size, because populations had  
67 diverged in life history strategies in different environments (Arriaga & Schlupp 2013).  
68 When females continue to grow after maturation, a situation that is common in  
69 vertebrates but rare in invertebrates, then the fecundity benefits of larger, non-virgin  
70 females may outweigh any benefits of reduced sperm competition achieved when mating  
71 with smaller, virgin females. Likewise, if older females have higher reproductive success  
72 as is the case for many birds (e.g. Angelier et al. 2007) and mammals (Margulis et al.  
73 2005), then a preference for less experienced females is unlikely to evolve. Males that  
74 preferentially mate with virgins will obtain few benefits if the female remates  
75 immediately after her first mating and or if female remating rate is high, because there  
76 will be only a short time window when sperm competition is reduced (Bonduriansky  
77 2001). Finally, if reproduction spans multiple distinct breeding seasons, i.e. if species are  
78 iteroparus and females do not store sperm between these events, males should evolve  
79 strategies to choose females who have not mated in that breeding season rather than  
80 choosing individuals that have never mated. The evolution of male mating preference for  
81 virgins, thus may be dependent on life history - short longevity and low remating  
82 frequency will promote the evolution of preference for virgins.  
83  
84 Many of the conditions necessary for the evolution of male mating preference for virgins

85 are present in the anolis lizard *Anolis apletophallus*. The species has a short life cycle  
86 going from egg to adult in ~160 days, and with less than 5% annual survival in the field  
87 (Andrews & Nichols 1990), they are essentially an annual species. Females lay eggs  
88 every 7-10 days, which can be fertilized from stored sperm from previous matings  
89 (Andrews & Rand 1974). Clutches from field caught females had between 1-2 fathers (18  
90 clutches, median clutch size =8) (J. Stapley unpublished data), so there is the potential for  
91 sperm competition. However, based on observations in the lab *A. apletophallus* seems  
92 reluctant to remate. For example, when placed with two males sequentially, each trial  
93 separated by 4 days, females never remated with the second male (J. Stapley unpublished  
94 data). Also, females that were not sperm depleted (producing fertile eggs in the lab) did  
95 not mate readily in mating trials (J. Stapley unpublished data). Thus, it appears that  
96 remating rates are not high in *A. apletophallus*, compared to other lizards (Calsbeek et al.  
97 2007; Stapley 2008; Keogh et al. 2013). Finally, there is no evidence that female body  
98 size is related to fecundity. From females maintained in captivity (90 females, 956 eggs)  
99 female body size was not related to egg weight or hatchling weight, and inter egg interval  
100 was not related to female body size (J. Stapley unpublished data). In this species, clutch  
101 size is not a useful quantity to assess variation in fecundity, because clutch size is fixed at  
102 2 in anoles, and in *A. apletophallus* the majority of eggs are laid as singletons. Thus, *A.*  
103 *apletophallus* is essentially an annual species that has a relatively low remating  
104 frequency. Males that preferentially mate with virgin females have 100% paternity  
105 assurance of the first eggs that the female produces, with the probability of paternity  
106 dropping fairly slowly. Mating with smaller, virgin females is unlikely to have cost in  
107 terms of reduced female fecundity because there is no relationship between female body

108 size and fecundity.

109

110 Here I test if male *Anolis apletophallus* lizards prefer virgin females and if they use  
111 female body size to discriminate between virgins and non-virgins, as virgin females  
112 encountered by males in the field are smaller (<40mm) than non-virgin females (Andrews  
113 1989). I conducted two experiments; in the first I tested if males discriminate between a  
114 small virgin and a large non-virgin (a naturally occurring situation) and if they preferred  
115 virgins. I predicted that males would preferentially court the virgin to maximize their  
116 fertilisation success. In the second experiment, I tested if males could discriminate  
117 between a pair of large size matched females when one was a virgin and the other was  
118 not. If males use body size as a cue to virginity I predicted that males would display  
119 equally to both females. The large virgins probably never occur naturally in the field,  
120 except in cases of very low density.

121

## 122 **Methods**

123 Lizards were collected from Sobernia National Park and Barro Colorado Island in  
124 Panama. All lizards were housed in the laboratory for at least 4 weeks prior to  
125 experiments to allow them to acclimate. During this time they were housed individually  
126 in mesh cages (1m high X 60cm wide X 60cm long) that contained several dowel  
127 perches. These individual enclosures were housed within a large screened building on the  
128 edge of the rainforest. As such, light, temperature and humidity were the same as the  
129 surrounding rainforest. Animals were fed insects caught by sweep netting surrounding  
130 grass and rainforest edges, and lizards were sprayed with water daily. Enclosures were

131 checked daily for eggs. Virgin females were small females (<40mm snout vent length  
132 (SVL)) when collected in the field and after being held individually in the laboratory  
133 produced an infertile egg – indicating sexual maturity. Larger virgin females (43-45 mm)  
134 were females that were caught before reaching sexual maturity and held in isolation in the  
135 laboratory. Non-virgins were larger females (>40mm) when caught in the field and who  
136 had produced fertile eggs in the laboratory. Egg fertility is easily distinguished based on  
137 egg colour and the presence of a leathery shell. Infertile eggs are yellow, soft and lack an  
138 obvious shell; fertile eggs are white, firm and have a calcified shell.

139

140 In the first experiment (November-January) 12 males chose between a small  
141 virgin female (mean SVL and standard error =  $40 \pm 0.21$ mm) and a larger non-virgin  
142 (mean SVL =  $45 \pm 0.38$ mm). In the second experiment (January-March) 14 males had a  
143 choice between size-matched (within 1mm) virgin and non-virgin females (mean SVL =  
144  $44 \pm 0.23$ mm). In both experiments females and males were unfamiliar, they were  
145 collected from different populations approximately 1km apart and could not see each  
146 other while held in the laboratory. A total of 26 females were used, females were used  
147 twice but not in the same pair and had at least 10 days rest between experiments.

148

149 During the trials, males were placed into individual experimental cages (1m long  
150 X 1m high X 0.5m) where they remained for at least one week prior to experiments. This  
151 is long enough for lizards to acclimate and adopt normal behaviours such as movement  
152 between perches and assertion displays (J Stapley unpublished data). Each male  
153 enclosure contained two female enclosures at opposite ends of his enclosure,

154 approximately 80 cm apart. The female enclosures were round (15cm diameter X 15 cm  
155 high) plexiglass enclosures with a single dowel perch. Male snout vent length ranged  
156 from 43-48mm (mean 44.71mm) in the first experiment and 42-47mm (mean 45.3mm) in  
157 the second trial.

158

159 On the day of the experiment each female was placed into one of the female  
160 enclosures and male behaviour was recorded for one hour with a digital video camera.  
161 During this time, the camera was trained on the male and as such female behaviour was  
162 not formally recorded or analysed. The placement of virgins and non-virgins was  
163 balanced so half of the virgins went in the left enclosure and half went into the right.

164

165 During analysis of the video, the number of times a male displayed to each female  
166 was recorded. The direction of the display is easily assigned because males display with  
167 their dewlap perpendicular to the receiver and often look at the receiver before and after  
168 the display. The number of displays was compared using a Wilcox Sign Rank test. As  
169 females were on opposite sides of the enclosure there was no ambiguity in identifying the  
170 direction of the display. The male's position varied at the beginning of the experiment so  
171 I recorded if he was closer to the virgin or the non-virgin and tested if he preferentially  
172 displayed to the closer female using an Exact Binomial Test. The relationship between  
173 total number of displays and male snout vent length and condition (residuals of the  
174 regression between weight and snout vent length) was tested using a Generalised linear  
175 model with a Poisson error structure. Male display characteristics were also recorded. In  
176 *A. apletophallus* there are no courtship-specific behaviours, instead males have a



177 repertoire of displays that are used in many contexts (Jenssen & Hover 1974). There are  
178 five different display types (A-F) and ‘A’ and ‘B’ displays are used most commonly  
179 (Jenssen & Hover 1974). The ‘A’ display involves full extension of the dewlap followed  
180 by a stereotypical head bob pattern (Jenssen & Hover 1974; Jenssen & Hover 1976).  
181 During the ‘B’ display the head bob sequence begins and the dewlap is extended on or  
182 after the first head bob is produced (Jenssen & Hover 1974). The type of display and the  
183 number of head bobs per display were recorded and compared between virgins and non-  
184 virgins using a Wilcoxon signed rank sum test. The ‘C’, ‘D’, ‘E’ and ‘F’ displays are more  
185 commonly used in escalated contests between males and were not formally analysed in  
186 this study because they occurred at very low frequencies. All data were analysed using  
187 R.2.3.2 (R Development Core Team 2006). All individuals were released at the point of  
188 capture following experiments and the methods adhered to the ABS/ASAB guidelines for  
189 the ethical treatment of animals and were approved by the Smithsonian Tropical Research  
190 Institute (STRI) Institutional Animal Care and Use Committee.

191

## 192 **Results**

### 193 *Experiment 1 – Male presented with a small virgin and a large non-virgin*

194 Males displayed to the small virgin more often than to the large, non-virgin female  
195 (Figure 1,  $W = 108$ ,  $p = 0.03$ ). Males did not display more to the female that was closer at  
196 the beginning of the experiment (Binomial test  $p = 0.79$ ). The total number of displays  
197 was not related to male snout vent length ( $F_{1,11} = 1.52$ ,  $p = 0.24$ ) or condition ( $F_{1,11} = 1.33$ ,  
198  $p = 0.27$ ). The ‘A’ display was used most commonly, 43% of all displays were ‘A’ and  
199 32.3% were ‘B’. The proportion of A to B displays did not differ when the male

200 displayed to the virgin or the non-virgin (Wilcox signed rank sum test  $p = 0.59$ ) and  
201 displays directed to a virgin did not differ in the number of head bobs compared to those  
202 directed to the non-virgin (mean number  $\pm$  standard error (SE) of head bobs per display  
203 directed to virgin:  $8.30 \pm 0.91$ , non-virgin:  $10.67 \pm 2.71$ , Wilcox signed rank sum test  $p =$   
204  $0.28$ ).

205

206 *Experiment 2 – Male presented with size matched females; one virgin, one non-virgin*

207 Males displayed to virgins more often than non-virgins despite the fact that both females  
208 were the same size (Figure 2,  $W = 544.5$ ,  $p < 0.001$ ). Similar to the first experiment, males  
209 did not display more to the female he was closest to at the beginning of the trial  
210 (Binomial test  $p = 0.77$ ). The total number of displays was not related to male snout vent  
211 length ( $F_{1,13} = 0.13$ ,  $p = 0.71$ ) or condition ( $F_{1,13} = 0.47$ ,  $p = 0.50$ ). Again, males used ‘A’  
212 displays most often (42.8%) and ‘B’ was the second most common display (33.9%), the  
213 proportion of ‘A’ to ‘B’ displays and the number of head bobs per display did not differ  
214 between displays directed to virgins and non-virgins (Proportion ‘A’ to virgin and non-  
215 virgin: Wilcox signed rank sum test  $p = 0.58$ ; mean number  $\pm$  SE of head bobs per  
216 display directed to virgin:  $9.06 \pm 0.95$ , non-virgin:  $7.51 \pm 1.09$ , Wilcox signed rank sum test  
217  $p = 0.28$ ).

218

219 If I combine data from both experiments the findings do not change. The total number of  
220 displays in the second experiment was greater than the first (mean  $\pm$  standard error  
221 number of displays: experiment 1 =  $14.75 \pm 4.75$ , experiment 2 =  $22.9 \pm 6.28$ ), but this  
222 was not significant (Generalized linear model  $F_{1,25} = 1.06$ ,  $p = 0.31$ ).

223

## 224 **Discussion**

225 When given a choice between a virgin and non-virgin female, males preferentially  
226 displayed to and courted the virgin female, even when the two females were the same  
227 size. This suggests that males preferentially court virgins and that they did not necessarily  
228 use body size as a cue of female mating history. In the field, body size would be an  
229 accurate cue to mating history as females >40mm SVL have sperm in their sperm storage  
230 tubules, whereas females <40mm SVL do not (Andrews 1989). In both experiments,  
231 there was no physical contact between the sexes so males could not use tactile cues and  
232 they could not sample chemical cues deposited on the female's perches. Thus, it is likely  
233 they used visual cues to assess female mating history. In other cases where males prefer  
234 virgins, chemical signals were most commonly used (Bonduriansky 2001; Carazo et al.  
235 2004), and in the only other vertebrate example, males were unable to determine female  
236 mating history using visual cues only (Guevara-Fiore et al. 2009). Thus, these results  
237 represent one of the few examples of male mate preference for virgin females based on  
238 visual cues.

239

240 This precopulatory male mating preference is likely to benefit males, by reducing  
241 sperm competition of the first few eggs laid by the female. The male that mates with the  
242 virgin is likely to have 100% paternity assurance of the first egg and depending on female  
243 mating frequency he may also sire several more eggs laid by the female in the absence of  
244 any sperm competition. As mentioned earlier, compared to other lizards, *A. apletophallus*  
245 seem reluctant to remate and have low level of multiple paternity (1-2 sires). In contrast

246 in *Anolis sagrei*, 80% females mated multiply with up to four males siring offspring  
247 (Calsbeek et al. 2007), in *Eulamprus heatwolei*, multiple paternity in the field was 57%  
248 (Stapley & Keogh 2005) and in mating trials *Pseudemoia entrecasteuxii*, females were  
249 observed mating multiple times with the same male within a 10 hour period (Stapley  
250 2008). Mating duration is long in *A. apletophallus* (mean copulation time = 94 minutes ,  
251 range = 28-156 minutes) and if this is related to ejaculate volume or sperm transfer as it is  
252 in *Anolis sagrei* (Tokarz 1999) then it may represent a considerable energetic cost. In  
253 addition, courtship, involving dewlap extension and headbobs may increase vulnerability  
254 to predation and may be energetically demanding.

255

256 In contrast to expectations males did not use female body size to discriminate  
257 between virgins and non-virgins. In other cases where males prefer virgins, chemical  
258 signals were the most commonly used (Bonduriansky 2001; Carazo et al. 2004; Guevara-  
259 Fiore et al. 2009). In this study it is possible, but unlikely that males used chemical cues  
260 to assess female virginity. The female enclosures did not preclude airborne chemical cues,  
261 but males could not sample any substrate cues that females may have left on dowel  
262 perches. *Anolis* lizards, unlike some other lizard groups, rely almost completely on vision  
263 for communication and prey detection (Fleishman 1992). I never observed *A.*  
264 *apletophallus* tongue-flicking the air, but males were observed licking the dowel on a few  
265 occasions.

266

267 If males were not using chemical cues, how did they discriminate between virgins  
268 and non-virgins? In this system, I suggest that some aspect of female behaviour indicated

269 her reproductive status. This could have involved changes in posture, head and dewlap  
270 movements and/or subtle changes in female dorsal colouration. Behavioural signalling of  
271 reproductive status has been demonstrated in other taxa, for example virgin females  
272 maybe less resistant to male advances (Guevara-Fiore et al. 2009) or may be more  
273 gregarious (Oku et al. 2005). Interestingly, male *A. apletophallus* appeared to make  
274 decisions about approaching and displaying to a female from a considerable distance (up  
275 to one metre), looking at both females and moving directly to the virgin and courting her.  
276 Therefore, it appeared that males used relatively long distance cues and he could  
277 discriminate between females before he began displaying. This suggests that it was not  
278 necessarily a difference in the response of the female to the male display that enabled him  
279 to discriminate. This is not to say that when the male approached and began to display  
280 intensely the female did not provided additional feedback the encouraged even further  
281 courtship. Unfortunately, it was not possible in this study to closely monitor the female's  
282 behaviour and/or dorsal colouration but this may be worthy pursuit in future studies.

283

284 Male preference for virgin females was predicted to evolve under a certain set of  
285 circumstances, i.e. it was considered to be unlikely when female body size/age was  
286 positively related to reproductive success. However, results in the guppy contradict that  
287 and suggest this is not a general rule. More importantly, remating frequency and sperm  
288 storage may govern the evolution of this behaviour. In anoles and guppies females are  
289 able to store sperm between reproductive events, and they mate and lay eggs in a random  
290 order. In this sense, only in virgin females can males get any degree of paternity  
291 assurance and this assurance will decline with subsequent matings. Male preference for

292 younger or smaller females could also represent a strategy to minimize sperm  
293 competition. Although relatively rare it has been observed in two other lizards groups  
294 (skinks (Stapley 2008) and chameleons (Stuart-Fox & Whiting 2005) and fish (Dosen &  
295 Montgomerie 2004), but in these cases avoidance of sperm competition was not the  
296 suggested explanation for the behaviour. It is plausible that because male preference for  
297 larger females is so pervasive in vertebrates, male preference for virgins is relatively rare.  
298 The results of this study, highlight that in species where large females do not have  
299 reproductive benefits, or when sperm is stored between subsequent reproductive events  
300 selection on male preference for virgins may exist and give rise to the evolution of this  
301 preference function.

302

### 303 **Acknowledgements**

304 Special thanks go to Raineldo Urriola and Argeli Ruiz for logistic support in Panama.  
305 Thanks also go to John Christy for advice and support. Funding was provided by the  
306 Smithsonian Tropical Research Institute.

307

## 308 **References**

- 309 Andrews, R. M. 1989: Intra-population variation in age of sexual maturity of the tropical  
310 lizard *Anolis limifrons* in Panama. *Copeia* **1989**, 751-753.
- 311 Andrews, R. M. & Nichols, J. D. 1990: Temporal and spatial variation in survival rates of  
312 the tropical lizard *Anolis limifrons*. *Oikos* **57**, 215-221.
- 313 Andrews, R. M. & Rand, A. S. 1974: Reproductive effort in anoline lizards. *Ecology* **55**,  
314 1317-1327.
- 315 Angelier, F., Weimerskirch, H., Dano, S. & Chastel, O. 2007: Age, experience and  
316 reproductive performance in a long-lived bird: a hormonal perspective. *Behav*  
317 *Ecol Sociobiol* **61**, 611-621.
- 318 Arriaga, L. R. & Schlupp, I. 2013: Poeciliid male mate preference is influenced by female  
319 body size but not by fecundity *PeerJ* **1**.
- 320 Bonduriansky, R. 2001: The evolution of male mate choice in insects: a synthesis of ideas  
321 and evidence. *Biological Reviews* **76**, 305-339.
- 322 Calsbeek, R., Bonneaud, C., Prabhu, S., Manoukis, N. & Smith, T. B. 2007: Multiple  
323 paternity and sperm storage lead to increased genetic diversity in *Anolis* lizards.  
324 *Evolutionary Ecology Research* **9**, 495-503.
- 325 Carazo, P., Sanchez, E., Font, E. & Desfilis, E. 2004: Chemosensory cues allow male  
326 *Tenebrio molitor* beetles to assess the reproductive status of potential mates.  
327 *Animal Behaviour* **68**, 123-129.
- 328 Dosen, L. D. & Montgomerie, R. 2004: Female Size Influences Mate Preferences of Male  
329 Guppies. *Ethology* **110**, 245-255.
- 330 Fleishman, L. J. 1992: The influence of the sensory system and the environment on  
331 motion patterns in the visual displays of anoline lizards and other vertebrates.  
332 *American Naturalist* **139**, S36-S61.
- 333 Guevara-Fiore, P., Skinner, A. & Watt, P. J. 2009: Do male guppies distinguish virgin  
334 females from recently mated ones? *Animal Behaviour* **77**, 425-431.
- 335 Jenssen, T. A. & Hover, E. L. 1974: Display repertoire of *Anolis limifrons*. *American*  
336 *Zoologist* **14**, 1278-1278.
- 337 -. 1976: Display analysis of signature display of *Anolis limifrons* (Sauria-Iguanidae).  
338 *Behaviour* **57**, 227-240.
- 339 Keogh, J. S., Umbers, K., D.L., Wilson, E., Stapley, J. & Whiting, M. J. 2013: Influence  
340 of alternative reproductive tactics and pre- and postcopulatory sexual selection on  
341 paternity and offspring performance in a lizard. *Behav Ecol Sociobiol* **67**, 629-  
342 638.
- 343 Margulis, S. W., Nabong, M., Alaks, G., Walsh, A. & Lacy, R. C. 2005: Effects of early  
344 experience on subsequent parental behaviour and reproductive success in oldfield  
345 mice, *Peromyscus polionotus*. *Animal Behaviour* **69**, 627-634.
- 346 Oku, K., Yano, S., Osakabe, M. & Takafuji, A. 2005: Mating Strategies of *Tetranychus*  
347 *kanzawai* (Acari: Tetranychidae) in Relation to Mating Status of Females. *Annals*  
348 *of the Entomological Society of America* **98**, 625-628.
- 349 Ptacek, M. B. & Travis, J. 1997: Mate choice in the sailfin molly, *Poecilia latipinna*.  
350 *Evolution* **51**, 1217-1231.
- 351 R Development Core Team. 2006: R: A language and environment for statistical  
352 computing, Vienna, Austria.

- 353 Shine, R., Phillips, B., Wayne, H., LeMaster, M. & Mason, R. T. 2003: The lexicon of  
354 love: what cues cause size-assortative courtship by male garter snakes? Behav  
355 Ecol Sociobiol **53**, 234-237.
- 356 Stapley, J. 2008: Female mountain log skinks are more likely to mate with males that  
357 court more, not males that are dominant. Animal Behaviour **75**, 529-538.
- 358 Stapley, J. & Keogh, J. S. 2005: Behavioural syndromes influence mating systems:  
359 floater pairs of a lizard have heavier offspring. Behavioral Ecology **16**, 514-520.
- 360 Stuart-Fox, D. & Whiting, M. J. 2005: Male dwarf chameleons assess risk of courting  
361 large, aggressive females. Proceedings of the Royal Society of London - Series B:  
362 Biological Sciences (Supplement) **1**, 231-234.
- 363 Tokarz, R. R. 1999: Relationship between copulation duration and sperm transfer in the  
364 lizard *Anolis sagrei*. Herpetologica **55**, 234-241.
- 365 Whiting, M. J. & Bateman, P. W. 1999: Male preference for large females in the lizard  
366 *Platysaurus broadleyi*. Journal of Herpetology **33**, 309-312.
- 367 Wong, B. M. & Jennions, M. D. 2003: Costs influence male mate choice in a freshwater  
368 fish. Proceedings of the Royal Society of London - Series B: Biological Sciences  
369 (Supplement) **270**, S36-S38.
- 370

371

372



373 Figure 1. The mean number ( $\pm$  standard error) of male displays to the small virgin  
374 (40mm) and to the larger non-virgin female (45mm) during the 1 hour trial.

375

376 Figure 2. The mean number ( $\pm$  standard error) of male displays directed towards size  
377 matched virgin and non-virgin female during the 1 hour trial.

378

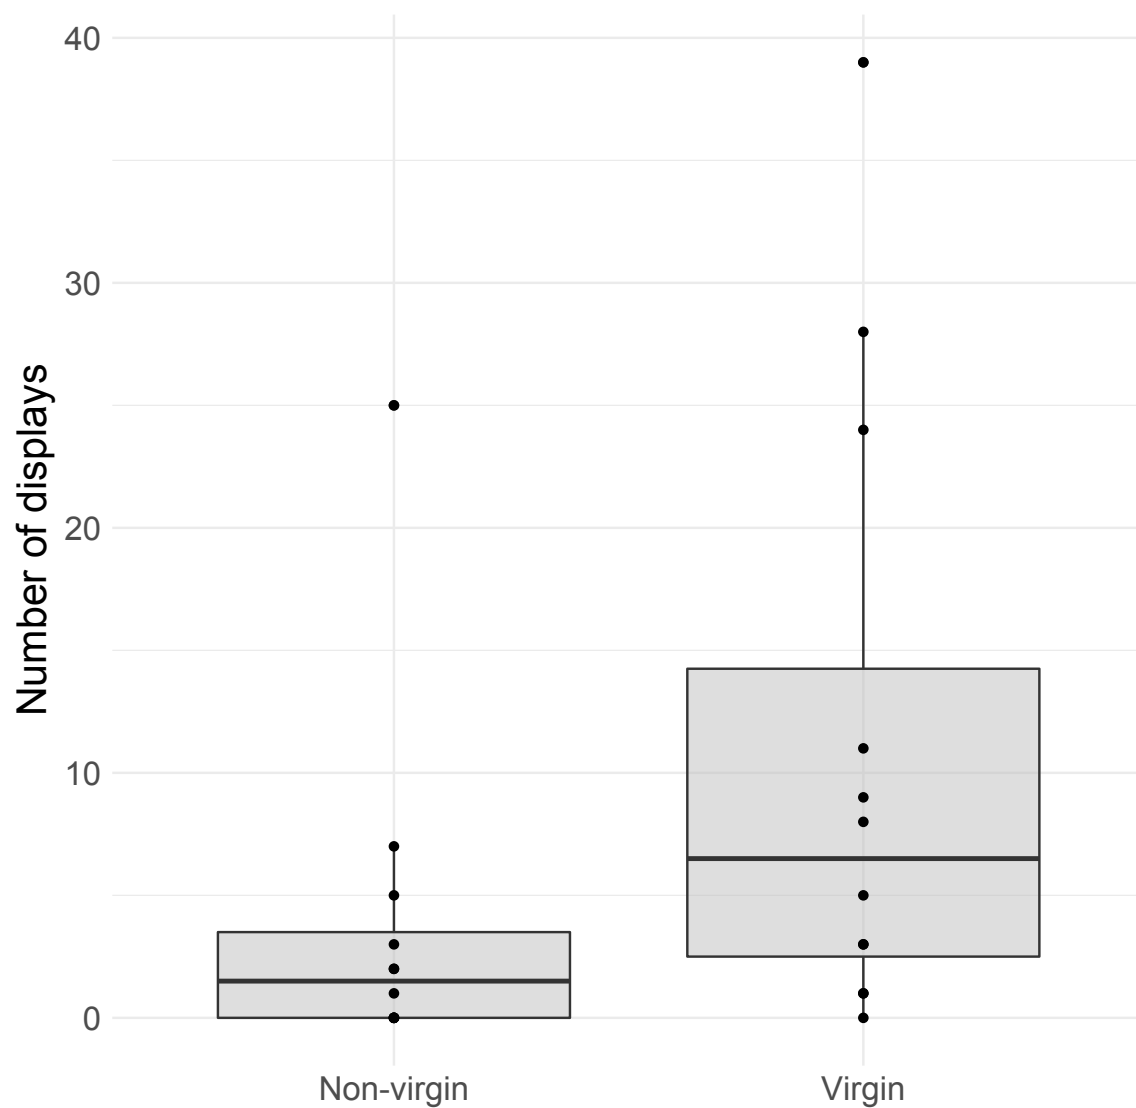

379

380

381

382

383

384

385

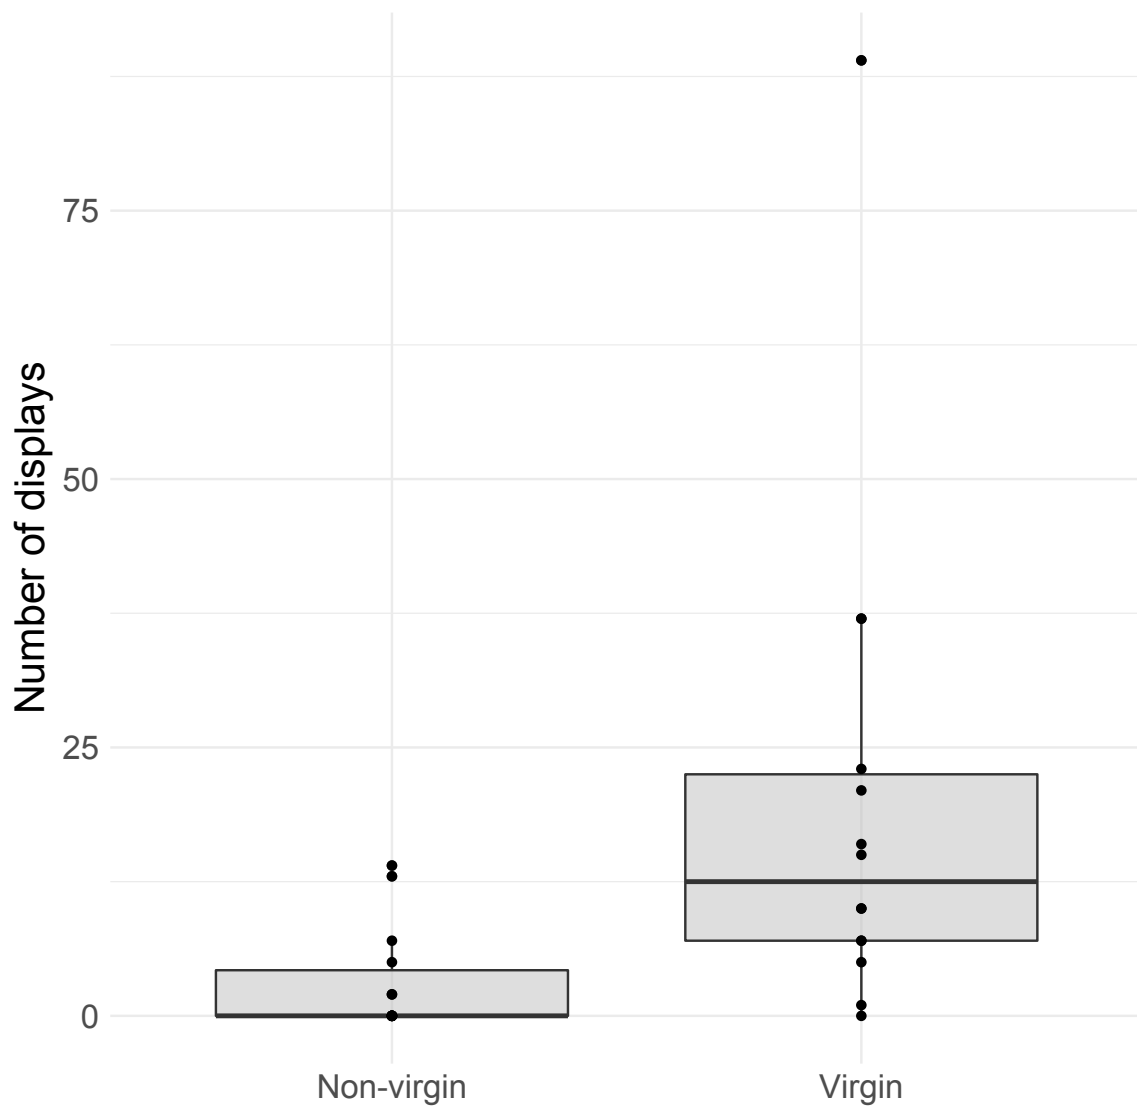

386

387

388

389

390
